# Supplementary material for: Fumaric acid production from fermented oil palm empty fruit bunches using fungal isolate K20: a comparison between free and immobilized cells
Source: PeerJ. 2024 Apr 22;12:e17282. doi: 10.7717/peerj.17282 (PMC11044876; doi:10.7717/peerj.17282)
Supplement: Supplemental Information 1 [file peerj-12-17282-s001.xlsx]

## Sheet: Chemical composition
				Component	Before	After Pre-treatment
					pre-treatment
				Cellulose	65.48±0.53	75.25±0.21
				Hemicellulose	22.19±0.37	2.02±0.05
				Lignin	15.18±0.7	7.50±0.42
				Extractive in ethanol/benzene	3.21±0.24	2.11±0.48
					Before				After
					1	2	3	avg	sd	1	2	3	avg	sd
				Cellulose	65.25	66.09	65.1	65.48	0.533573	75.16	75.52	75.15	75.2767	0.210792
				Hemicellulose	21.82	22.56	22.18	22.1867	0.370045	2.07	1.98	2.02	2.02333	0.0450925
				Lignin	15.62	15.54	14.39	15.1833	0.68821	7.96	7.15	7.38	7.49667	0.417413
				Extractive in ethanol/benzene	3.48	3.16	3	3.21333	0.244404	2.65	1.75	1.92	2.10667	0.478156
