# Supplementary material for: Fumaric acid production from fermented oil palm empty fruit bunches using fungal isolate K20: a comparison between free and immobilized cells
Source: PeerJ. 2024 Apr 22;12:e17282. doi: 10.7717/peerj.17282 (PMC11044876; doi:10.7717/peerj.17282)
Supplement: Supplemental Information 2 [file peerj-12-17282-s002.xlsx]

## Sheet: Fumaric 
	sugar	Time, h					Glucose conc (g/L)
		0	24	48	72	96	0	24	48	72	96
	80	0	31.67	32.97	37.45	36.59	80	67.5	58.21	44.43	42.98
	100	0	37.09	39.12	44	43	100	75.25	63.87	38.1	30.55
	120	0	35.39	37.29	39	37	120	95.24	82.45	57.15	55.12
initial oil palm EFB-derived glucose (g/L)	Time	Fumaric acid (g/L)				Remaining glucose (g/L)
		1	2	avg	sd	1	2	avg	sd
80	0	0	0	0	0	80	80	80	0	0	80
	24	31.3	32.03	31.665	0.516188	66.53	68.46	67.495	1.36472
	48	32.38	33.56	32.97	0.834386	58.9	57.51	58.205	0.982878
	72	36.64	38.26	37.45	1.14551	43.15	45.7	44.425	1.80312
	96	36.72	36.45	36.585	0.190919	42.73	43.23	42.98	0.353553
100	0	0	0	0	0	100	100	100	0
	24	37.89	36.28	37.085	1.13844	74.46	76.03	75.245	1.11016
	48	39.68	38.56	39.12	0.79196	63.51	64.23	63.87	0.509117
	72	44.05	43.44	43.745	0.431335	36.94	39.26	38.1	1.64049
	96	42.83	43.21	43.02	0.268701	31.01	30.08	30.545	0.657609
120	0	0	0	0	0	120	120	120	0
	24	34.52	36.26	35.39	1.23037	94.18	96.29	95.235	1.492
	48	36.83	37.74	37.285	0.643467	81.78	83.12	82.45	0.947523
	72	39.64	38.16	38.9	1.04652	56.12	58.17	57.145	1.44957
	96	36.55	37.46	37.005	0.643467	54.98	55.25	55.115	0.190919
												Fig. 3 Fumaric acid (solid line) and remaining glucose (dash line) concentrations at initial glucose concentrations (g/L) of 80 (¨), 100 (l), and 120 ().
